# Supplementary figures and images for: Searching for the Best Machine Learning Algorithm for the Detection of Left Ventricular Hypertrophy from the ECG: A Review
Source: MDPI journal article supplement (doi:10.3390/bioengineering11050489), 2024-05-15

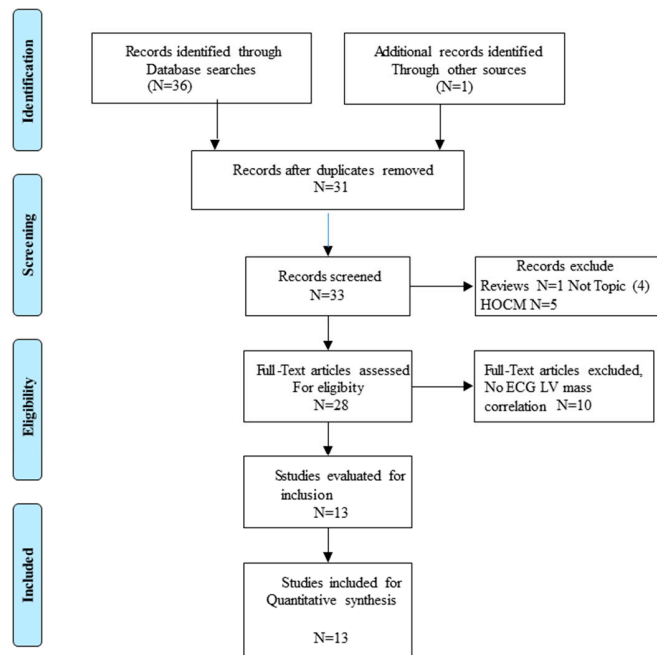

Figure S1: Preferred Reporting Items for Reviews and Meta-Analysis (PRISMA)

Supplement: s1 [file s1]
